# Supplementary material
Source: publisher figshare collection journal article supplement (https://acs.figshare.com/ndownloader/files/4470322)
Supplement: Supplementary file 1 [file 4470322]

 
data_CaH 

_publ_contact_author               'Prof. Dr. Dietmar Stalke' 
_publ_contact_author_email         dstalke@chemie.uni-goettingen.de 
  
loop_ 
_publ_author_name                  'S. Sarish, H. W. Roesky, T. Schulz, D. Stalke' 
_journal_name_full                 '?' 
_journal_volume                    '?' 
_journal_page_first                '?' 
_journal_page_last                 '?' 
_journal_year                      '?' 
_ccdc_journal_depnumber            '?' 
  
_ccdc_compound_id                  'CaH'
 
_audit_creation_method            SHELXL-97 
_chemical_name_systematic 
; 
 ? 
; 
_chemical_name_common             ? 
_chemical_melting_point           ? 
_chemical_formula_moiety          ? 
_chemical_formula_sum 
 'C45 H77 B Ca N2 O' 
_chemical_formula_weight          712.98 
 
loop_ 
 _atom_type_symbol 
 _atom_type_description 
 _atom_type_scat_dispersion_real 
 _atom_type_scat_dispersion_imag 
 _atom_type_scat_source 
 'C'  'C'   0.0033   0.0016 
 'International Tables Vol C Tables 4.2.6.8 and 6.1.1.4' 
 'H'  'H'   0.0000   0.0000 
 'International Tables Vol C Tables 4.2.6.8 and 6.1.1.4' 
 'B'  'B'   0.0013   0.0007 
 'International Tables Vol C Tables 4.2.6.8 and 6.1.1.4' 
 'N'  'N'   0.0061   0.0033 
 'International Tables Vol C Tables 4.2.6.8 and 6.1.1.4' 
 'Ca'  'Ca'   0.2262   0.3064 
 'International Tables Vol C Tables 4.2.6.8 and 6.1.1.4' 
 'O'  'O'   0.0106   0.0060 
 'International Tables Vol C Tables 4.2.6.8 and 6.1.1.4' 
 
_symmetry_cell_setting            monoclinic 
_symmetry_space_group_name_H-M    P2(1)/c 
 
loop_ 
 _symmetry_equiv_pos_as_xyz 
 'x, y, z' 
 '-x, y+1/2, -z+1/2' 
 '-x, -y, -z' 
 'x, -y-1/2, z-1/2' 
 
_cell_length_a                    20.749(5) 
_cell_length_b                    13.176(3) 
_cell_length_c                    16.106(4) 
_cell_angle_alpha                 90.00 
_cell_angle_beta                  99.155(5) 
_cell_angle_gamma                 90.00 
_cell_volume                      4347.1(18) 
_cell_formula_units_Z             4 
_cell_measurement_temperature     100(2) 
_cell_measurement_reflns_used     8233 
_cell_measurement_theta_min       2.33 
_cell_measurement_theta_max       25.41 
 
_exptl_crystal_description        block 
_exptl_crystal_colour             colourless 
_exptl_crystal_size_max           0.15 
_exptl_crystal_size_mid           0.1 
_exptl_crystal_size_min           0.1 
_exptl_crystal_density_meas       ? 
_exptl_crystal_density_diffrn     1.089 
_exptl_crystal_density_method     'not measured' 
_exptl_crystal_F_000              1576 
_exptl_absorpt_coefficient_mu     0.178 
_exptl_absorpt_correction_type    empirical 
_exptl_absorpt_correction_T_min   0.4503
_exptl_absorpt_correction_T_max   0.7452 
_exptl_absorpt_process_details    SADABS-2008/2 
 
_exptl_special_details 
; 
 ? 
; 
 
_diffrn_ambient_temperature       100(2) 
_diffrn_radiation_wavelength      0.71073 
_diffrn_radiation_type            MoK\a 
_diffrn_radiation_source          'INCOATEC Microsource' 
_diffrn_radiation_monochromator   'INCOATEC Helios mirror optics'
_diffrn_measurement_device_type   'Bruker Smart Apex II with D8-Goniometer'
_diffrn_measurement_method        'omega scans'
_diffrn_detector_area_resol_mean  ? 
_diffrn_reflns_number             31406 
_diffrn_reflns_av_R_equivalents   0.1110 
_diffrn_reflns_av_sigmaI/netI     0.0997 
_diffrn_reflns_limit_h_min        -25 
_diffrn_reflns_limit_h_max        24 
_diffrn_reflns_limit_k_min        -15 
_diffrn_reflns_limit_k_max        15 
_diffrn_reflns_limit_l_min        -19 
_diffrn_reflns_limit_l_max        19 
_diffrn_reflns_theta_min          0.99 
_diffrn_reflns_theta_max          25.51 
_reflns_number_total              7992 
_reflns_number_gt                 4447 
_reflns_threshold_expression      >2sigma(I) 
 
_computing_data_collection        'APEX2 v2.2-0'
_computing_cell_refinement        'SAINT V7.46A'
_computing_data_reduction         'SAINT V7.46A'
_computing_structure_solution     'SHELXS in SHELXTL ver. 6.10' 
_computing_structure_refinement   'SHELXL in SHELXTL ver. 6.10'
_computing_molecular_graphics     'XP in SHELXTL ver. 6.10'
_computing_publication_material   'XP in SHELXTL ver. 6.10'
 
_refine_special_details 
; 
 Refinement of F^2^ against ALL reflections.  The weighted R-factor wR and 
 goodness of fit S are based on F^2^, conventional R-factors R are based 
 on F, with F set to zero for negative F^2^. The threshold expression of 
 F^2^ > 2sigma(F^2^) is used only for calculating R-factors(gt) etc. and is 
 not relevant to the choice of reflections for refinement.  R-factors based 
 on F^2^ are statistically about twice as large as those based on F, and R- 
 factors based on ALL data will be even larger. 
; 
 
_refine_ls_structure_factor_coef  Fsqd  
_refine_ls_matrix_type            full 
_refine_ls_weighting_scheme       calc  
_refine_ls_weighting_details 
 'calc w=1/[\s^2^(Fo^2^)+(0.0879P)^2^+0.8065P] where P=(Fo^2^+2Fc^2^)/3' 
_atom_sites_solution_primary      direct 
_atom_sites_solution_secondary    difmap 
_atom_sites_solution_hydrogens    geom 
_refine_ls_hydrogen_treatment     mixed 
_refine_ls_extinction_method      none 
_refine_ls_extinction_coef        ? 
_refine_ls_number_reflns          7992 
_refine_ls_number_parameters      471 
_refine_ls_number_restraints      0 
_refine_ls_R_factor_all           0.1346 
_refine_ls_R_factor_gt            0.0645 
_refine_ls_wR_factor_ref          0.1797 
_refine_ls_wR_factor_gt           0.1480 
_refine_ls_goodness_of_fit_ref    1.001 
_refine_ls_restrained_S_all       1.001 
_refine_ls_shift/su_max           0.000 
_refine_ls_shift/su_mean          0.000 
 
loop_ 
 _atom_site_label 
 _atom_site_type_symbol 
 _atom_site_fract_x 
 _atom_site_fract_y 
 _atom_site_fract_z 
 _atom_site_U_iso_or_equiv 
 _atom_site_adp_type 
 _atom_site_occupancy 
 _atom_site_symmetry_multiplicity 
 _atom_site_calc_flag 
 _atom_site_refinement_flags 
 _atom_site_disorder_assembly 
 _atom_site_disorder_group 
Ca1 Ca 0.25849(3) 0.53476(6) 0.35636(5) 0.0278(2) Uani 1 1 d . . . 
H100 H 0.3433(14) 0.630(2) 0.359(2) 0.024(8) Uiso 1 1 d . . . 
N1 N 0.25480(12) 0.3777(2) 0.28835(18) 0.0285(7) Uani 1 1 d . . . 
N2 N 0.15496(12) 0.4741(2) 0.37842(17) 0.0263(7) Uani 1 1 d . . . 
B1 B 0.32853(19) 0.7154(3) 0.3285(3) 0.0315(10) Uani 1 1 d . . . 
C1 C 0.07327(15) 0.3489(3) 0.4078(2) 0.0342(9) Uani 1 1 d . . . 
H1A H 0.0784 0.3455 0.4693 0.051 Uiso 1 1 calc R . . 
H1B H 0.0596 0.2824 0.3840 0.051 Uiso 1 1 calc R . . 
H1C H 0.0401 0.3997 0.3871 0.051 Uiso 1 1 calc R . . 
C2 C 0.13777(15) 0.3783(3) 0.3818(2) 0.0270(8) Uani 1 1 d . . . 
C3 C 0.17471(15) 0.2970(3) 0.3603(2) 0.0319(9) Uani 1 1 d . . . 
H3 H 0.1631 0.2328 0.3802 0.038 Uiso 1 1 calc R . . 
C4 C 0.22697(15) 0.2954(3) 0.3133(2) 0.0306(8) Uani 1 1 d . . . 
C5 C 0.24977(18) 0.1903(3) 0.2938(3) 0.0423(10) Uani 1 1 d . . . 
H5A H 0.2670 0.1918 0.2406 0.063 Uiso 1 1 calc R . . 
H5B H 0.2130 0.1429 0.2891 0.063 Uiso 1 1 calc R . . 
H5C H 0.2842 0.1681 0.3391 0.063 Uiso 1 1 calc R . . 
C6 C 0.29461(16) 0.3687(3) 0.2229(2) 0.0310(9) Uani 1 1 d . . . 
C7 C 0.26452(16) 0.3810(3) 0.1395(2) 0.0324(9) Uani 1 1 d . . . 
C8 C 0.30351(18) 0.3843(3) 0.0766(2) 0.0388(10) Uani 1 1 d . . . 
H8 H 0.2839 0.3927 0.0196 0.047 Uiso 1 1 calc R . . 
C9 C 0.37050(18) 0.3755(3) 0.0967(3) 0.0411(10) Uani 1 1 d . . . 
H9 H 0.3966 0.3778 0.0533 0.049 Uiso 1 1 calc R . . 
C10 C 0.39934(17) 0.3637(3) 0.1776(3) 0.0367(10) Uani 1 1 d . . . 
H10 H 0.4455 0.3579 0.1901 0.044 Uiso 1 1 calc R . . 
C11 C 0.36279(16) 0.3597(3) 0.2431(2) 0.0316(9) Uani 1 1 d . . . 
C12 C 0.39712(16) 0.3432(3) 0.3319(2) 0.0356(9) Uani 1 1 d . . . 
H12 H 0.3636 0.3473 0.3701 0.043 Uiso 1 1 calc R . . 
C13 C 0.44879(18) 0.4222(3) 0.3601(3) 0.0448(10) Uani 1 1 d . . . 
H13A H 0.4822 0.4198 0.3235 0.067 Uiso 1 1 calc R . . 
H13B H 0.4690 0.4082 0.4182 0.067 Uiso 1 1 calc R . . 
H13C H 0.4287 0.4896 0.3570 0.067 Uiso 1 1 calc R . . 
C14 C 0.4278(2) 0.2381(3) 0.3418(3) 0.0546(12) Uani 1 1 d . . . 
H14A H 0.4627 0.2334 0.3075 0.082 Uiso 1 1 calc R . . 
H14B H 0.3945 0.1867 0.3233 0.082 Uiso 1 1 calc R . . 
H14C H 0.4461 0.2266 0.4010 0.082 Uiso 1 1 calc R . . 
C15 C 0.19098(17) 0.3892(3) 0.1166(3) 0.0405(10) Uani 1 1 d . . . 
H15 H 0.1745 0.4198 0.1661 0.049 Uiso 1 1 calc R . . 
C16 C 0.15962(18) 0.2861(3) 0.1018(3) 0.0526(12) Uani 1 1 d . . . 
H16A H 0.1121 0.2938 0.0897 0.079 Uiso 1 1 calc R . . 
H16B H 0.1714 0.2441 0.1521 0.079 Uiso 1 1 calc R . . 
H16C H 0.1750 0.2535 0.0539 0.079 Uiso 1 1 calc R . . 
C17 C 0.1687(2) 0.4573(4) 0.0418(3) 0.0535(12) Uani 1 1 d . . . 
H17A H 0.1914 0.5227 0.0501 0.080 Uiso 1 1 calc R . . 
H17B H 0.1215 0.4683 0.0363 0.080 Uiso 1 1 calc R . . 
H17C H 0.1788 0.4250 -0.0094 0.080 Uiso 1 1 calc R . . 
C18 C 0.11137(15) 0.5530(3) 0.3947(2) 0.0278(8) Uani 1 1 d . . . 
C19 C 0.10548(15) 0.5797(3) 0.4775(2) 0.0298(8) Uani 1 1 d . . . 
C20 C 0.06938(16) 0.6657(3) 0.4893(3) 0.0346(9) Uani 1 1 d . . . 
H20 H 0.0660 0.6863 0.5450 0.041 Uiso 1 1 calc R . . 
C21 C 0.03854(16) 0.7218(3) 0.4230(3) 0.0376(10) Uani 1 1 d . . . 
H21 H 0.0144 0.7806 0.4329 0.045 Uiso 1 1 calc R . . 
C22 C 0.04265(17) 0.6925(3) 0.3424(3) 0.0378(10) Uani 1 1 d . . . 
H22 H 0.0200 0.7303 0.2966 0.045 Uiso 1 1 calc R . . 
C23 C 0.07941(16) 0.6086(3) 0.3265(2) 0.0315(9) Uani 1 1 d . . . 
C24 C 0.08299(17) 0.5760(3) 0.2369(2) 0.0352(9) Uani 1 1 d . . . 
H24 H 0.1277 0.5474 0.2375 0.042 Uiso 1 1 calc R . . 
C25 C 0.0753(2) 0.6609(3) 0.1733(3) 0.0480(11) Uani 1 1 d . . . 
H25A H 0.0874 0.6365 0.1204 0.072 Uiso 1 1 calc R . . 
H25B H 0.1038 0.7176 0.1948 0.072 Uiso 1 1 calc R . . 
H25C H 0.0298 0.6838 0.1635 0.072 Uiso 1 1 calc R . . 
C26 C 0.0354(2) 0.4913(4) 0.2084(3) 0.0586(13) Uani 1 1 d . . . 
H26A H 0.0447 0.4331 0.2464 0.088 Uiso 1 1 calc R . . 
H26B H 0.0400 0.4708 0.1511 0.088 Uiso 1 1 calc R . . 
H26C H -0.0092 0.5150 0.2093 0.088 Uiso 1 1 calc R . . 
C27 C 0.13625(16) 0.5189(3) 0.5533(2) 0.0330(9) Uani 1 1 d . . . 
H27 H 0.1541 0.4549 0.5325 0.040 Uiso 1 1 calc R . . 
C28 C 0.19211(17) 0.5751(3) 0.6059(3) 0.0402(10) Uani 1 1 d . . . 
H28A H 0.2267 0.5872 0.5722 0.060 Uiso 1 1 calc R . . 
H28B H 0.2094 0.5342 0.6552 0.060 Uiso 1 1 calc R . . 
H28C H 0.1763 0.6401 0.6242 0.060 Uiso 1 1 calc R . . 
C29 C 0.08614(17) 0.4894(3) 0.6102(2) 0.0412(10) Uani 1 1 d . . . 
H29A H 0.1056 0.4396 0.6520 0.062 Uiso 1 1 calc R . . 
H29B H 0.0475 0.4598 0.5758 0.062 Uiso 1 1 calc R . . 
H29C H 0.0734 0.5500 0.6389 0.062 Uiso 1 1 calc R . . 
C30 C 0.32575(15) 0.7043(3) 0.2264(2) 0.0314(9) Uani 1 1 d . . . 
H30 H 0.3241 0.7746 0.2028 0.038 Uiso 1 1 calc R . . 
C31 C 0.38785(17) 0.6538(3) 0.2045(2) 0.0362(9) Uani 1 1 d . . . 
H31A H 0.4262 0.6880 0.2372 0.043 Uiso 1 1 calc R . . 
H31B H 0.3886 0.5822 0.2233 0.043 Uiso 1 1 calc R . . 
C32 C 0.39536(18) 0.6555(3) 0.1121(2) 0.0416(10) Uani 1 1 d . . . 
H32A H 0.3598 0.6166 0.0793 0.062 Uiso 1 1 calc R . . 
H32B H 0.4373 0.6252 0.1053 0.062 Uiso 1 1 calc R . . 
H32C H 0.3937 0.7258 0.0920 0.062 Uiso 1 1 calc R . . 
C33 C 0.26554(17) 0.6484(3) 0.1818(2) 0.0377(9) Uani 1 1 d . . . 
H33A H 0.2670 0.6455 0.1213 0.057 Uiso 1 1 calc R . . 
H33B H 0.2261 0.6845 0.1913 0.057 Uiso 1 1 calc R . . 
H33C H 0.2649 0.5793 0.2042 0.057 Uiso 1 1 calc R . . 
C34 C 0.25623(16) 0.7467(3) 0.3547(2) 0.0308(8) Uani 1 1 d . . . 
H34 H 0.2224 0.7015 0.3226 0.037 Uiso 1 1 calc R . . 
C35 C 0.25305(16) 0.7343(3) 0.4483(2) 0.0357(9) Uani 1 1 d . . . 
H35A H 0.2831 0.7824 0.4808 0.054 Uiso 1 1 calc R . . 
H35B H 0.2656 0.6649 0.4659 0.054 Uiso 1 1 calc R . . 
H35C H 0.2085 0.7475 0.4583 0.054 Uiso 1 1 calc R . . 
C36 C 0.23909(17) 0.8562(3) 0.3287(3) 0.0384(9) Uani 1 1 d . . . 
H36A H 0.2462 0.8655 0.2699 0.046 Uiso 1 1 calc R . . 
H36B H 0.2698 0.9019 0.3643 0.046 Uiso 1 1 calc R . . 
C37 C 0.16931(18) 0.8895(3) 0.3351(3) 0.0433(10) Uani 1 1 d . . . 
H37A H 0.1383 0.8479 0.2974 0.065 Uiso 1 1 calc R . . 
H37B H 0.1636 0.9610 0.3189 0.065 Uiso 1 1 calc R . . 
H37C H 0.1614 0.8810 0.3931 0.065 Uiso 1 1 calc R . . 
C38 C 0.38682(16) 0.7912(3) 0.3754(2) 0.0342(9) Uani 1 1 d . . . 
H38 H 0.3694 0.8223 0.4240 0.041 Uiso 1 1 calc R . . 
C39 C 0.44990(17) 0.7369(3) 0.4131(3) 0.0399(10) Uani 1 1 d . . . 
H39A H 0.4691 0.7044 0.3680 0.060 Uiso 1 1 calc R . . 
H39B H 0.4402 0.6852 0.4531 0.060 Uiso 1 1 calc R . . 
H39C H 0.4808 0.7863 0.4423 0.060 Uiso 1 1 calc R . . 
C40 C 0.40357(18) 0.8806(3) 0.3209(3) 0.0399(10) Uani 1 1 d . . . 
H40A H 0.4309 0.8552 0.2802 0.048 Uiso 1 1 calc R . . 
H40B H 0.3626 0.9076 0.2884 0.048 Uiso 1 1 calc R . . 
C41 C 0.4394(2) 0.9663(3) 0.3713(3) 0.0534(12) Uani 1 1 d . . . 
H41A H 0.4116 0.9949 0.4092 0.080 Uiso 1 1 calc R . . 
H41B H 0.4500 1.0192 0.3329 0.080 Uiso 1 1 calc R . . 
H41C H 0.4797 0.9402 0.4043 0.080 Uiso 1 1 calc R . . 
O1 O 0.31625(11) 0.47654(19) 0.48389(15) 0.0331(6) Uani 1 1 d . . . 
C60 C 0.37099(17) 0.5228(3) 0.5376(2) 0.0383(9) Uani 1 1 d . . . 
H60A H 0.3575 0.5871 0.5614 0.046 Uiso 1 1 calc R . . 
H60B H 0.4067 0.5374 0.5052 0.046 Uiso 1 1 calc R . . 
C61 C 0.3931(2) 0.4484(3) 0.6060(3) 0.0494(11) Uani 1 1 d . . . 
H61A H 0.4094 0.4834 0.6596 0.059 Uiso 1 1 calc R . . 
H61B H 0.4280 0.4039 0.5911 0.059 Uiso 1 1 calc R . . 
C62 C 0.33222(18) 0.3891(3) 0.6119(3) 0.0430(10) Uani 1 1 d . . . 
H62A H 0.3427 0.3211 0.6364 0.052 Uiso 1 1 calc R . . 
H62B H 0.3039 0.4255 0.6460 0.052 Uiso 1 1 calc R . . 
C63 C 0.30090(18) 0.3820(3) 0.5224(2) 0.0387(10) Uani 1 1 d . . . 
H63A H 0.3185 0.3235 0.4946 0.046 Uiso 1 1 calc R . . 
H63B H 0.2531 0.3736 0.5182 0.046 Uiso 1 1 calc R . . 
 
loop_ 
 _atom_site_aniso_label 
 _atom_site_aniso_U_11 
 _atom_site_aniso_U_22 
 _atom_site_aniso_U_33 
 _atom_site_aniso_U_23 
 _atom_site_aniso_U_13 
 _atom_site_aniso_U_12 
Ca1 0.0197(3) 0.0361(4) 0.0303(4) -0.0007(4) 0.0125(3) -0.0020(3) 
N1 0.0177(13) 0.0388(18) 0.0317(17) -0.0038(14) 0.0125(12) 0.0001(13) 
N2 0.0201(13) 0.0347(18) 0.0269(16) -0.0001(14) 0.0118(12) 0.0014(13) 
B1 0.030(2) 0.035(2) 0.033(2) 0.002(2) 0.0143(19) -0.0033(19) 
C1 0.0214(17) 0.041(2) 0.045(2) -0.0022(19) 0.0175(17) -0.0068(16) 
C2 0.0193(16) 0.039(2) 0.0240(19) -0.0002(17) 0.0082(14) -0.0028(15) 
C3 0.0256(18) 0.036(2) 0.037(2) -0.0005(18) 0.0157(16) -0.0032(16) 
C4 0.0215(17) 0.037(2) 0.036(2) -0.0017(18) 0.0123(16) 0.0017(16) 
C5 0.038(2) 0.040(2) 0.055(3) -0.007(2) 0.028(2) -0.0017(18) 
C6 0.0250(17) 0.033(2) 0.039(2) -0.0058(18) 0.0170(16) -0.0004(15) 
C7 0.0301(18) 0.036(2) 0.034(2) -0.0026(18) 0.0145(17) 0.0023(16) 
C8 0.039(2) 0.050(2) 0.030(2) 0.0000(19) 0.0135(17) 0.0022(19) 
C9 0.036(2) 0.051(3) 0.043(3) -0.004(2) 0.0265(19) -0.0024(19) 
C10 0.0233(18) 0.046(2) 0.045(3) -0.006(2) 0.0190(18) -0.0025(17) 
C11 0.0246(17) 0.034(2) 0.040(2) 0.0012(18) 0.0166(16) 0.0000(15) 
C12 0.0220(17) 0.051(2) 0.036(2) 0.001(2) 0.0117(16) 0.0016(17) 
C13 0.033(2) 0.058(3) 0.043(3) -0.005(2) 0.0066(18) -0.0018(19) 
C14 0.044(2) 0.055(3) 0.064(3) 0.008(3) 0.005(2) 0.006(2) 
C15 0.0290(19) 0.057(3) 0.037(2) -0.011(2) 0.0090(17) 0.0053(19) 
C16 0.029(2) 0.070(3) 0.059(3) -0.005(3) 0.010(2) -0.003(2) 
C17 0.047(2) 0.060(3) 0.049(3) -0.005(2) -0.007(2) 0.008(2) 
C18 0.0162(15) 0.035(2) 0.036(2) 0.0003(17) 0.0135(15) -0.0030(14) 
C19 0.0190(17) 0.038(2) 0.035(2) -0.0044(18) 0.0127(15) -0.0029(15) 
C20 0.0239(17) 0.044(2) 0.040(2) -0.009(2) 0.0166(17) -0.0025(17) 
C21 0.0249(18) 0.036(2) 0.057(3) -0.002(2) 0.0202(19) 0.0029(17) 
C22 0.0265(19) 0.044(2) 0.046(3) 0.004(2) 0.0136(18) 0.0025(17) 
C23 0.0235(17) 0.036(2) 0.039(2) 0.0010(18) 0.0160(16) -0.0018(16) 
C24 0.0315(19) 0.041(2) 0.035(2) 0.0018(19) 0.0098(17) 0.0018(17) 
C25 0.045(2) 0.058(3) 0.043(3) 0.008(2) 0.012(2) 0.009(2) 
C26 0.065(3) 0.070(3) 0.041(3) -0.003(2) 0.010(2) -0.020(3) 
C27 0.0245(17) 0.044(2) 0.033(2) -0.0045(19) 0.0134(16) 0.0013(16) 
C28 0.0285(19) 0.054(2) 0.041(2) 0.000(2) 0.0149(18) -0.0023(18) 
C29 0.034(2) 0.055(3) 0.039(2) 0.000(2) 0.0171(18) -0.0055(18) 
C30 0.0272(18) 0.035(2) 0.034(2) 0.0022(18) 0.0125(16) -0.0011(16) 
C31 0.0320(19) 0.043(2) 0.036(2) 0.0017(19) 0.0130(17) 0.0015(17) 
C32 0.036(2) 0.054(3) 0.038(2) 0.002(2) 0.0177(18) 0.0025(19) 
C33 0.0336(19) 0.048(2) 0.032(2) 0.001(2) 0.0094(17) -0.0003(18) 
C34 0.0248(17) 0.035(2) 0.034(2) -0.0013(18) 0.0087(15) -0.0072(16) 
C35 0.0276(19) 0.047(2) 0.036(2) 0.0004(19) 0.0155(17) -0.0024(17) 
C36 0.035(2) 0.038(2) 0.045(2) 0.002(2) 0.0151(18) -0.0007(17) 
C37 0.039(2) 0.043(2) 0.050(3) 0.002(2) 0.0150(19) 0.0029(19) 
C38 0.0297(19) 0.044(2) 0.032(2) 0.0010(18) 0.0155(16) -0.0037(17) 
C39 0.0281(19) 0.050(3) 0.043(2) 0.003(2) 0.0089(17) -0.0089(18) 
C40 0.0313(19) 0.043(2) 0.049(3) 0.001(2) 0.0185(18) -0.0043(18) 
C41 0.046(2) 0.043(2) 0.075(3) -0.002(3) 0.020(2) -0.008(2) 
O1 0.0275(12) 0.0393(15) 0.0344(14) 0.0023(13) 0.0102(11) -0.0057(11) 
C60 0.0308(19) 0.048(2) 0.036(2) 0.000(2) 0.0053(17) -0.0128(18) 
C61 0.045(2) 0.056(3) 0.046(3) 0.015(2) 0.001(2) -0.009(2) 
C62 0.043(2) 0.045(2) 0.044(3) 0.005(2) 0.019(2) -0.0017(19) 
C63 0.035(2) 0.038(2) 0.044(3) 0.008(2) 0.0107(18) -0.0073(17) 
 
_geom_special_details 
; 
 All esds (except the esd in the dihedral angle between two l.s. planes) 
 are estimated using the full covariance matrix.  The cell esds are taken 
 into account individually in the estimation of esds in distances, angles 
 and torsion angles; correlations between esds in cell parameters are only 
 used when they are defined by crystal symmetry.  An approximate (isotropic) 
 treatment of cell esds is used for estimating esds involving l.s. planes. 
; 
 
loop_ 
 _geom_bond_atom_site_label_1 
 _geom_bond_atom_site_label_2 
 _geom_bond_distance 
 _geom_bond_site_symmetry_2 
 _geom_bond_publ_flag 
Ca1 N1 2.337(3) . ? 
Ca1 O1 2.337(3) . ? 
Ca1 N2 2.371(3) . ? 
Ca1 B1 2.861(4) . ? 
Ca1 H100 2.16(3) . ? 
N1 C4 1.322(4) . ? 
N1 C6 1.444(4) . ? 
N2 C2 1.315(4) . ? 
N2 C18 1.430(4) . ? 
B1 C30 1.643(6) . ? 
B1 C38 1.655(6) . ? 
B1 C34 1.673(5) . ? 
B1 H100 1.24(3) . ? 
C1 C2 1.515(4) . ? 
C1 H1A 0.9800 . ? 
C1 H1B 0.9800 . ? 
C1 H1C 0.9800 . ? 
C2 C3 1.392(5) . ? 
C3 C4 1.418(4) . ? 
C3 H3 0.9500 . ? 
C4 C5 1.512(5) . ? 
C5 H5A 0.9800 . ? 
C5 H5B 0.9800 . ? 
C5 H5C 0.9800 . ? 
C6 C7 1.397(5) . ? 
C6 C11 1.405(5) . ? 
C7 C8 1.394(5) . ? 
C7 C15 1.516(5) . ? 
C8 C9 1.381(5) . ? 
C8 H8 0.9500 . ? 
C9 C10 1.355(6) . ? 
C9 H9 0.9500 . ? 
C10 C11 1.395(5) . ? 
C10 H10 0.9500 . ? 
C11 C12 1.508(5) . ? 
C12 C13 1.512(5) . ? 
C12 C14 1.521(6) . ? 
C12 H12 1.0000 . ? 
C13 H13A 0.9800 . ? 
C13 H13B 0.9800 . ? 
C13 H13C 0.9800 . ? 
C14 H14A 0.9800 . ? 
C14 H14B 0.9800 . ? 
C14 H14C 0.9800 . ? 
C15 C16 1.509(6) . ? 
C15 C17 1.515(6) . ? 
C15 H15 1.0000 . ? 
C16 H16A 0.9800 . ? 
C16 H16B 0.9800 . ? 
C16 H16C 0.9800 . ? 
C17 H17A 0.9800 . ? 
C17 H17B 0.9800 . ? 
C17 H17C 0.9800 . ? 
C18 C23 1.398(5) . ? 
C18 C19 1.403(5) . ? 
C19 C20 1.389(5) . ? 
C19 C27 1.514(5) . ? 
C20 C21 1.370(5) . ? 
C20 H20 0.9500 . ? 
C21 C22 1.370(5) . ? 
C21 H21 0.9500 . ? 
C22 C23 1.390(5) . ? 
C22 H22 0.9500 . ? 
C23 C24 1.518(5) . ? 
C24 C25 1.508(5) . ? 
C24 C26 1.513(6) . ? 
C24 H24 1.0000 . ? 
C25 H25A 0.9800 . ? 
C25 H25B 0.9800 . ? 
C25 H25C 0.9800 . ? 
C26 H26A 0.9800 . ? 
C26 H26B 0.9800 . ? 
C26 H26C 0.9800 . ? 
C27 C28 1.515(5) . ? 
C27 C29 1.541(5) . ? 
C27 H27 1.0000 . ? 
C28 H28A 0.9800 . ? 
C28 H28B 0.9800 . ? 
C28 H28C 0.9800 . ? 
C29 H29A 0.9800 . ? 
C29 H29B 0.9800 . ? 
C29 H29C 0.9800 . ? 
C30 C33 1.528(5) . ? 
C30 C31 1.540(5) . ? 
C30 H30 1.0000 . ? 
C31 C32 1.522(5) . ? 
C31 H31A 0.9900 . ? 
C31 H31B 0.9900 . ? 
C32 H32A 0.9800 . ? 
C32 H32B 0.9800 . ? 
C32 H32C 0.9800 . ? 
C33 H33A 0.9800 . ? 
C33 H33B 0.9800 . ? 
C33 H33C 0.9800 . ? 
C34 C36 1.528(5) . ? 
C34 C35 1.529(5) . ? 
C34 H34 1.0000 . ? 
C35 H35A 0.9800 . ? 
C35 H35B 0.9800 . ? 
C35 H35C 0.9800 . ? 
C36 C37 1.532(5) . ? 
C36 H36A 0.9900 . ? 
C36 H36B 0.9900 . ? 
C37 H37A 0.9800 . ? 
C37 H37B 0.9800 . ? 
C37 H37C 0.9800 . ? 
C38 C39 1.530(5) . ? 
C38 C40 1.542(5) . ? 
C38 H38 1.0000 . ? 
C39 H39A 0.9800 . ? 
C39 H39B 0.9800 . ? 
C39 H39C 0.9800 . ? 
C40 C41 1.514(6) . ? 
C40 H40A 0.9900 . ? 
C40 H40B 0.9900 . ? 
C41 H41A 0.9800 . ? 
C41 H41B 0.9800 . ? 
C41 H41C 0.9800 . ? 
O1 C60 1.448(4) . ? 
O1 C63 1.450(4) . ? 
C60 C61 1.491(5) . ? 
C60 H60A 0.9900 . ? 
C60 H60B 0.9900 . ? 
C61 C62 1.502(5) . ? 
C61 H61A 0.9900 . ? 
C61 H61B 0.9900 . ? 
C62 C63 1.486(6) . ? 
C62 H62A 0.9900 . ? 
C62 H62B 0.9900 . ? 
C63 H63A 0.9900 . ? 
C63 H63B 0.9900 . ? 
 
loop_ 
 _geom_angle_atom_site_label_1 
 _geom_angle_atom_site_label_2 
 _geom_angle_atom_site_label_3 
 _geom_angle 
 _geom_angle_site_symmetry_1 
 _geom_angle_site_symmetry_3 
 _geom_angle_publ_flag 
N1 Ca1 O1 95.47(10) . . ? 
N1 Ca1 N2 78.97(9) . . ? 
O1 Ca1 N2 96.19(9) . . ? 
N1 Ca1 B1 130.00(11) . . ? 
O1 Ca1 B1 102.03(11) . . ? 
N2 Ca1 B1 143.02(11) . . ? 
N1 Ca1 H100 119.4(8) . . ? 
O1 Ca1 H100 82.7(9) . . ? 
N2 Ca1 H100 161.7(8) . . ? 
B1 Ca1 H100 23.8(8) . . ? 
C4 N1 C6 118.9(3) . . ? 
C4 N1 Ca1 124.6(2) . . ? 
C6 N1 Ca1 115.8(2) . . ? 
C2 N2 C18 120.5(3) . . ? 
C2 N2 Ca1 126.0(2) . . ? 
C18 N2 Ca1 113.4(2) . . ? 
C30 B1 C38 114.6(3) . . ? 
C30 B1 C34 112.5(3) . . ? 
C38 B1 C34 110.9(3) . . ? 
C30 B1 Ca1 98.3(2) . . ? 
C38 B1 Ca1 141.5(3) . . ? 
C34 B1 Ca1 70.60(18) . . ? 
C30 B1 H100 106.2(15) . . ? 
C38 B1 H100 104.4(14) . . ? 
C34 B1 H100 107.5(14) . . ? 
Ca1 B1 H100 44.6(14) . . ? 
C2 C1 H1A 109.5 . . ? 
C2 C1 H1B 109.5 . . ? 
H1A C1 H1B 109.5 . . ? 
C2 C1 H1C 109.5 . . ? 
H1A C1 H1C 109.5 . . ? 
H1B C1 H1C 109.5 . . ? 
N2 C2 C3 124.4(3) . . ? 
N2 C2 C1 120.9(3) . . ? 
C3 C2 C1 114.7(3) . . ? 
C2 C3 C4 130.0(3) . . ? 
C2 C3 H3 115.0 . . ? 
C4 C3 H3 115.0 . . ? 
N1 C4 C3 123.9(3) . . ? 
N1 C4 C5 121.5(3) . . ? 
C3 C4 C5 114.6(3) . . ? 
C4 C5 H5A 109.5 . . ? 
C4 C5 H5B 109.5 . . ? 
H5A C5 H5B 109.5 . . ? 
C4 C5 H5C 109.5 . . ? 
H5A C5 H5C 109.5 . . ? 
H5B C5 H5C 109.5 . . ? 
C7 C6 C11 120.8(3) . . ? 
C7 C6 N1 118.2(3) . . ? 
C11 C6 N1 120.6(3) . . ? 
C8 C7 C6 118.7(3) . . ? 
C8 C7 C15 119.9(3) . . ? 
C6 C7 C15 121.4(3) . . ? 
C9 C8 C7 120.4(4) . . ? 
C9 C8 H8 119.8 . . ? 
C7 C8 H8 119.8 . . ? 
C10 C9 C8 120.6(3) . . ? 
C10 C9 H9 119.7 . . ? 
C8 C9 H9 119.7 . . ? 
C9 C10 C11 121.5(3) . . ? 
C9 C10 H10 119.3 . . ? 
C11 C10 H10 119.3 . . ? 
C10 C11 C6 118.0(3) . . ? 
C10 C11 C12 119.4(3) . . ? 
C6 C11 C12 122.6(3) . . ? 
C11 C12 C13 113.0(3) . . ? 
C11 C12 C14 111.0(3) . . ? 
C13 C12 C14 109.2(3) . . ? 
C11 C12 H12 107.8 . . ? 
C13 C12 H12 107.8 . . ? 
C14 C12 H12 107.8 . . ? 
C12 C13 H13A 109.5 . . ? 
C12 C13 H13B 109.5 . . ? 
H13A C13 H13B 109.5 . . ? 
C12 C13 H13C 109.5 . . ? 
H13A C13 H13C 109.5 . . ? 
H13B C13 H13C 109.5 . . ? 
C12 C14 H14A 109.5 . . ? 
C12 C14 H14B 109.5 . . ? 
H14A C14 H14B 109.5 . . ? 
C12 C14 H14C 109.5 . . ? 
H14A C14 H14C 109.5 . . ? 
H14B C14 H14C 109.5 . . ? 
C16 C15 C17 109.8(3) . . ? 
C16 C15 C7 111.5(3) . . ? 
C17 C15 C7 113.8(3) . . ? 
C16 C15 H15 107.2 . . ? 
C17 C15 H15 107.2 . . ? 
C7 C15 H15 107.2 . . ? 
C15 C16 H16A 109.5 . . ? 
C15 C16 H16B 109.5 . . ? 
H16A C16 H16B 109.5 . . ? 
C15 C16 H16C 109.5 . . ? 
H16A C16 H16C 109.5 . . ? 
H16B C16 H16C 109.5 . . ? 
C15 C17 H17A 109.5 . . ? 
C15 C17 H17B 109.5 . . ? 
H17A C17 H17B 109.5 . . ? 
C15 C17 H17C 109.5 . . ? 
H17A C17 H17C 109.5 . . ? 
H17B C17 H17C 109.5 . . ? 
C23 C18 C19 120.9(3) . . ? 
C23 C18 N2 118.2(3) . . ? 
C19 C18 N2 120.7(3) . . ? 
C20 C19 C18 117.7(3) . . ? 
C20 C19 C27 119.3(3) . . ? 
C18 C19 C27 123.0(3) . . ? 
C21 C20 C19 121.9(3) . . ? 
C21 C20 H20 119.1 . . ? 
C19 C20 H20 119.1 . . ? 
C22 C21 C20 119.7(3) . . ? 
C22 C21 H21 120.2 . . ? 
C20 C21 H21 120.2 . . ? 
C21 C22 C23 121.2(4) . . ? 
C21 C22 H22 119.4 . . ? 
C23 C22 H22 119.4 . . ? 
C22 C23 C18 118.5(3) . . ? 
C22 C23 C24 120.8(3) . . ? 
C18 C23 C24 120.7(3) . . ? 
C25 C24 C26 110.4(3) . . ? 
C25 C24 C23 114.8(3) . . ? 
C26 C24 C23 111.6(3) . . ? 
C25 C24 H24 106.5 . . ? 
C26 C24 H24 106.5 . . ? 
C23 C24 H24 106.5 . . ? 
C24 C25 H25A 109.5 . . ? 
C24 C25 H25B 109.5 . . ? 
H25A C25 H25B 109.5 . . ? 
C24 C25 H25C 109.5 . . ? 
H25A C25 H25C 109.5 . . ? 
H25B C25 H25C 109.5 . . ? 
C24 C26 H26A 109.5 . . ? 
C24 C26 H26B 109.5 . . ? 
H26A C26 H26B 109.5 . . ? 
C24 C26 H26C 109.5 . . ? 
H26A C26 H26C 109.5 . . ? 
H26B C26 H26C 109.5 . . ? 
C19 C27 C28 112.3(3) . . ? 
C19 C27 C29 112.0(3) . . ? 
C28 C27 C29 108.6(3) . . ? 
C19 C27 H27 107.9 . . ? 
C28 C27 H27 107.9 . . ? 
C29 C27 H27 107.9 . . ? 
C27 C28 H28A 109.5 . . ? 
C27 C28 H28B 109.5 . . ? 
H28A C28 H28B 109.5 . . ? 
C27 C28 H28C 109.5 . . ? 
H28A C28 H28C 109.5 . . ? 
H28B C28 H28C 109.5 . . ? 
C27 C29 H29A 109.5 . . ? 
C27 C29 H29B 109.5 . . ? 
H29A C29 H29B 109.5 . . ? 
C27 C29 H29C 109.5 . . ? 
H29A C29 H29C 109.5 . . ? 
H29B C29 H29C 109.5 . . ? 
C33 C30 C31 109.6(3) . . ? 
C33 C30 B1 114.2(3) . . ? 
C31 C30 B1 111.7(3) . . ? 
C33 C30 H30 107.0 . . ? 
C31 C30 H30 107.0 . . ? 
B1 C30 H30 107.0 . . ? 
C32 C31 C30 115.9(3) . . ? 
C32 C31 H31A 108.3 . . ? 
C30 C31 H31A 108.3 . . ? 
C32 C31 H31B 108.3 . . ? 
C30 C31 H31B 108.3 . . ? 
H31A C31 H31B 107.4 . . ? 
C31 C32 H32A 109.5 . . ? 
C31 C32 H32B 109.5 . . ? 
H32A C32 H32B 109.5 . . ? 
C31 C32 H32C 109.5 . . ? 
H32A C32 H32C 109.5 . . ? 
H32B C32 H32C 109.5 . . ? 
C30 C33 H33A 109.5 . . ? 
C30 C33 H33B 109.5 . . ? 
H33A C33 H33B 109.5 . . ? 
C30 C33 H33C 109.5 . . ? 
H33A C33 H33C 109.5 . . ? 
H33B C33 H33C 109.5 . . ? 
C36 C34 C35 109.0(3) . . ? 
C36 C34 B1 110.1(3) . . ? 
C35 C34 B1 113.7(3) . . ? 
C36 C34 H34 107.9 . . ? 
C35 C34 H34 107.9 . . ? 
B1 C34 H34 107.9 . . ? 
C34 C35 H35A 109.5 . . ? 
C34 C35 H35B 109.5 . . ? 
H35A C35 H35B 109.5 . . ? 
C34 C35 H35C 109.5 . . ? 
H35A C35 H35C 109.5 . . ? 
H35B C35 H35C 109.5 . . ? 
C34 C36 C37 115.7(3) . . ? 
C34 C36 H36A 108.4 . . ? 
C37 C36 H36A 108.4 . . ? 
C34 C36 H36B 108.4 . . ? 
C37 C36 H36B 108.4 . . ? 
H36A C36 H36B 107.4 . . ? 
C36 C37 H37A 109.5 . . ? 
C36 C37 H37B 109.5 . . ? 
H37A C37 H37B 109.5 . . ? 
C36 C37 H37C 109.5 . . ? 
H37A C37 H37C 109.5 . . ? 
H37B C37 H37C 109.5 . . ? 
C39 C38 C40 109.1(3) . . ? 
C39 C38 B1 114.6(3) . . ? 
C40 C38 B1 114.6(3) . . ? 
C39 C38 H38 105.9 . . ? 
C40 C38 H38 105.9 . . ? 
B1 C38 H38 105.9 . . ? 
C38 C39 H39A 109.5 . . ? 
C38 C39 H39B 109.5 . . ? 
H39A C39 H39B 109.5 . . ? 
C38 C39 H39C 109.5 . . ? 
H39A C39 H39C 109.5 . . ? 
H39B C39 H39C 109.5 . . ? 
C41 C40 C38 113.6(4) . . ? 
C41 C40 H40A 108.8 . . ? 
C38 C40 H40A 108.8 . . ? 
C41 C40 H40B 108.8 . . ? 
C38 C40 H40B 108.8 . . ? 
H40A C40 H40B 107.7 . . ? 
C40 C41 H41A 109.5 . . ? 
C40 C41 H41B 109.5 . . ? 
H41A C41 H41B 109.5 . . ? 
C40 C41 H41C 109.5 . . ? 
H41A C41 H41C 109.5 . . ? 
H41B C41 H41C 109.5 . . ? 
C60 O1 C63 108.1(3) . . ? 
C60 O1 Ca1 129.1(2) . . ? 
C63 O1 Ca1 122.8(2) . . ? 
O1 C60 C61 106.6(3) . . ? 
O1 C60 H60A 110.4 . . ? 
C61 C60 H60A 110.4 . . ? 
O1 C60 H60B 110.4 . . ? 
C61 C60 H60B 110.4 . . ? 
H60A C60 H60B 108.6 . . ? 
C60 C61 C62 103.0(3) . . ? 
C60 C61 H61A 111.2 . . ? 
C62 C61 H61A 111.2 . . ? 
C60 C61 H61B 111.2 . . ? 
C62 C61 H61B 111.2 . . ? 
H61A C61 H61B 109.1 . . ? 
C63 C62 C61 102.4(3) . . ? 
C63 C62 H62A 111.3 . . ? 
C61 C62 H62A 111.3 . . ? 
C63 C62 H62B 111.3 . . ? 
C61 C62 H62B 111.3 . . ? 
H62A C62 H62B 109.2 . . ? 
O1 C63 C62 105.6(3) . . ? 
O1 C63 H63A 110.6 . . ? 
C62 C63 H63A 110.6 . . ? 
O1 C63 H63B 110.6 . . ? 
C62 C63 H63B 110.6 . . ? 
H63A C63 H63B 108.8 . . ? 
 
loop_ 
 _geom_torsion_atom_site_label_1 
 _geom_torsion_atom_site_label_2 
 _geom_torsion_atom_site_label_3 
 _geom_torsion_atom_site_label_4 
 _geom_torsion 
 _geom_torsion_site_symmetry_1 
 _geom_torsion_site_symmetry_2 
 _geom_torsion_site_symmetry_3 
 _geom_torsion_site_symmetry_4 
 _geom_torsion_publ_flag 
O1 Ca1 N1 C4 60.5(3) . . . . ? 
N2 Ca1 N1 C4 -34.7(3) . . . . ? 
B1 Ca1 N1 C4 171.2(3) . . . . ? 
O1 Ca1 N1 C6 -109.6(2) . . . . ? 
N2 Ca1 N1 C6 155.2(2) . . . . ? 
B1 Ca1 N1 C6 1.1(3) . . . . ? 
N1 Ca1 N2 C2 27.1(3) . . . . ? 
O1 Ca1 N2 C2 -67.3(3) . . . . ? 
B1 Ca1 N2 C2 173.2(3) . . . . ? 
N1 Ca1 N2 C18 -157.4(2) . . . . ? 
O1 Ca1 N2 C18 108.2(2) . . . . ? 
B1 Ca1 N2 C18 -11.3(3) . . . . ? 
N1 Ca1 B1 C30 33.2(3) . . . . ? 
O1 Ca1 B1 C30 141.0(2) . . . . ? 
N2 Ca1 B1 C30 -101.2(2) . . . . ? 
N1 Ca1 B1 C38 -116.4(4) . . . . ? 
O1 Ca1 B1 C38 -8.6(4) . . . . ? 
N2 Ca1 B1 C38 109.2(4) . . . . ? 
N1 Ca1 B1 C34 144.22(19) . . . . ? 
O1 Ca1 B1 C34 -108.0(2) . . . . ? 
N2 Ca1 B1 C34 9.8(3) . . . . ? 
C18 N2 C2 C3 174.6(3) . . . . ? 
Ca1 N2 C2 C3 -10.1(5) . . . . ? 
C18 N2 C2 C1 -3.6(5) . . . . ? 
Ca1 N2 C2 C1 171.7(2) . . . . ? 
N2 C2 C3 C4 -16.9(6) . . . . ? 
C1 C2 C3 C4 161.4(4) . . . . ? 
C6 N1 C4 C3 -163.4(3) . . . . ? 
Ca1 N1 C4 C3 26.7(5) . . . . ? 
C6 N1 C4 C5 17.2(5) . . . . ? 
Ca1 N1 C4 C5 -152.7(3) . . . . ? 
C2 C3 C4 N1 7.8(7) . . . . ? 
C2 C3 C4 C5 -172.8(4) . . . . ? 
C4 N1 C6 C7 90.7(4) . . . . ? 
Ca1 N1 C6 C7 -98.6(3) . . . . ? 
C4 N1 C6 C11 -96.6(4) . . . . ? 
Ca1 N1 C6 C11 74.1(4) . . . . ? 
C11 C6 C7 C8 -0.1(6) . . . . ? 
N1 C6 C7 C8 172.6(3) . . . . ? 
C11 C6 C7 C15 179.1(3) . . . . ? 
N1 C6 C7 C15 -8.2(5) . . . . ? 
C6 C7 C8 C9 0.1(6) . . . . ? 
C15 C7 C8 C9 -179.2(4) . . . . ? 
C7 C8 C9 C10 -0.1(6) . . . . ? 
C8 C9 C10 C11 0.1(6) . . . . ? 
C9 C10 C11 C6 -0.2(6) . . . . ? 
C9 C10 C11 C12 178.1(4) . . . . ? 
C7 C6 C11 C10 0.2(5) . . . . ? 
N1 C6 C11 C10 -172.4(3) . . . . ? 
C7 C6 C11 C12 -178.1(3) . . . . ? 
N1 C6 C11 C12 9.4(5) . . . . ? 
C10 C11 C12 C13 57.2(5) . . . . ? 
C6 C11 C12 C13 -124.7(4) . . . . ? 
C10 C11 C12 C14 -65.9(4) . . . . ? 
C6 C11 C12 C14 112.2(4) . . . . ? 
C8 C7 C15 C16 91.1(5) . . . . ? 
C6 C7 C15 C16 -88.1(4) . . . . ? 
C8 C7 C15 C17 -33.7(5) . . . . ? 
C6 C7 C15 C17 147.1(4) . . . . ? 
C2 N2 C18 C23 -105.1(4) . . . . ? 
Ca1 N2 C18 C23 79.0(3) . . . . ? 
C2 N2 C18 C19 80.5(4) . . . . ? 
Ca1 N2 C18 C19 -95.3(3) . . . . ? 
C23 C18 C19 C20 -2.9(5) . . . . ? 
N2 C18 C19 C20 171.3(3) . . . . ? 
C23 C18 C19 C27 176.8(3) . . . . ? 
N2 C18 C19 C27 -9.0(5) . . . . ? 
C18 C19 C20 C21 2.0(5) . . . . ? 
C27 C19 C20 C21 -177.7(3) . . . . ? 
C19 C20 C21 C22 0.5(5) . . . . ? 
C20 C21 C22 C23 -2.1(5) . . . . ? 
C21 C22 C23 C18 1.2(5) . . . . ? 
C21 C22 C23 C24 179.3(3) . . . . ? 
C19 C18 C23 C22 1.4(5) . . . . ? 
N2 C18 C23 C22 -173.0(3) . . . . ? 
C19 C18 C23 C24 -176.7(3) . . . . ? 
N2 C18 C23 C24 9.0(5) . . . . ? 
C22 C23 C24 C25 29.1(5) . . . . ? 
C18 C23 C24 C25 -152.9(3) . . . . ? 
C22 C23 C24 C26 -97.5(4) . . . . ? 
C18 C23 C24 C26 80.5(4) . . . . ? 
C20 C19 C27 C28 -69.7(4) . . . . ? 
C18 C19 C27 C28 110.5(4) . . . . ? 
C20 C19 C27 C29 52.8(4) . . . . ? 
C18 C19 C27 C29 -126.9(3) . . . . ? 
C38 B1 C30 C33 -170.7(3) . . . . ? 
C34 B1 C30 C33 -42.8(4) . . . . ? 
Ca1 B1 C30 C33 29.6(3) . . . . ? 
C38 B1 C30 C31 64.3(4) . . . . ? 
C34 B1 C30 C31 -167.8(3) . . . . ? 
Ca1 B1 C30 C31 -95.4(3) . . . . ? 
C33 C30 C31 C32 62.1(4) . . . . ? 
B1 C30 C31 C32 -170.3(3) . . . . ? 
C30 B1 C34 C36 -70.4(4) . . . . ? 
C38 B1 C34 C36 59.5(4) . . . . ? 
Ca1 B1 C34 C36 -161.6(3) . . . . ? 
C30 B1 C34 C35 166.9(3) . . . . ? 
C38 B1 C34 C35 -63.2(4) . . . . ? 
Ca1 B1 C34 C35 75.7(3) . . . . ? 
C35 C34 C36 C37 -64.5(4) . . . . ? 
B1 C34 C36 C37 170.0(3) . . . . ? 
C30 B1 C38 C39 -95.1(4) . . . . ? 
C34 B1 C38 C39 136.1(3) . . . . ? 
Ca1 B1 C38 C39 51.4(5) . . . . ? 
C30 B1 C38 C40 32.1(4) . . . . ? 
C34 B1 C38 C40 -96.7(4) . . . . ? 
Ca1 B1 C38 C40 178.6(3) . . . . ? 
C39 C38 C40 C41 -68.9(4) . . . . ? 
B1 C38 C40 C41 161.1(3) . . . . ? 
N1 Ca1 O1 C60 136.1(3) . . . . ? 
N2 Ca1 O1 C60 -144.5(3) . . . . ? 
B1 Ca1 O1 C60 3.2(3) . . . . ? 
N1 Ca1 O1 C63 -43.7(2) . . . . ? 
N2 Ca1 O1 C63 35.8(2) . . . . ? 
B1 Ca1 O1 C63 -176.6(2) . . . . ? 
C63 O1 C60 C61 5.6(4) . . . . ? 
Ca1 O1 C60 C61 -174.2(2) . . . . ? 
O1 C60 C61 C62 -26.8(4) . . . . ? 
C60 C61 C62 C63 37.2(4) . . . . ? 
C60 O1 C63 C62 18.3(4) . . . . ? 
Ca1 O1 C63 C62 -161.9(2) . . . . ? 
C61 C62 C63 O1 -34.4(4) . . . . ? 
 
_diffrn_measured_fraction_theta_max    0.986 
_diffrn_reflns_theta_full              25.51 
_diffrn_measured_fraction_theta_full   0.986 
_refine_diff_density_max    0.381 
_refine_diff_density_min   -0.602 
_refine_diff_density_rms    0.064 
